# Supplementary material
Source: MDPI journal article supplement (https://www.mdpi.com/2311-5521/6/9/321)

**Table S1.** Summary and comparison of the average overall gas holdup for Case1-4; ECVT data vs. visual reference (VR), mean values and overall mean deviation. The mean deviations were calculated as percentage ratios of the ECVT versus the visual reference.

| Liquid flow mode   | POCS type          | Average overall gas holdup $\varepsilon_G$ / - x10 <sup>-3</sup> | Superficial gas velocity $u_G$ m*s <sup>-1</sup> x10 <sup>-3</sup> |        |        |        |        |        |
|--------------------|--------------------|------------------------------------------------------------------|--------------------------------------------------------------------|--------|--------|--------|--------|--------|
|                    |                    |                                                                  | 2.6                                                                | 5.2    | 7.7    | 10.3   | 12.9   | 15.5   |
| Stagnant           | w/o                | ECVT                                                             | 12.0                                                               | 17.1   | 25.2   | 33.9   | 44.0   | 53.6   |
|                    |                    | Visual reference                                                 | 9.4                                                                | 20.0   | 26.5   | 30.3   | 41.7   | 45.5   |
| Mean deviation / % |                    | Difference / %                                                   | -26.8                                                              | 14.7   | 4.9    | -11.6  | -5.4   | -17.9  |
| 13.5               |                    | Difference absolut / %                                           | 26.8                                                               | 14.7   | 4.9    | 11.6   | 5.4    | 17.9   |
| Stagnant           | 6mm regular        | ECVT                                                             | 9.9                                                                | 18.1   | 23.8   | 35.3   | 42.6   | 47.0   |
|                    |                    | Visual reference                                                 | 10.7                                                               | 18.6   | 26.3   | 32.7   | 45.2   | 51.3   |
| Mean deviation / % |                    | Difference / %                                                   | 7.5                                                                | 2.3    | 9.5    | -8.0   | 5.6    | 8.3    |
| 6.9                |                    | Difference absolut / %                                           | 7.5                                                                | 2.3    | 9.5    | 8.0    | 5.6    | 8.3    |
| Stagnant           | 6mm on the tip     | ECVT                                                             | 20.3                                                               | 34.2   | 46.7   | 58.8   | 75.7   | 90.9   |
|                    |                    | Visual reference                                                 | 17.3                                                               | 28.9   | 39.1   | 51.4   | 65.8   | 80.9   |
| Mean deviation / % |                    | Difference / %                                                   | -17.4                                                              | -18.0  | -19.6  | -14.4  | -15.0  | -12.3  |
| 16.1               |                    | Difference absolut / %                                           | 17.4                                                               | 18.0   | 19.6   | 14.4   | 15.0   | 12.3   |
| Stagnant           | 5mm on the tip     | ECVT                                                             | 62.8                                                               | 122.8  | 168.9  | 215.1  | 261.7  | 306.3  |
|                    |                    | Visual reference                                                 | 19.9                                                               | 39.1   | 51.4   | 57.5   | 69.4   | 80.9   |
| Mean deviation / % |                    | Difference / %                                                   | -215.4                                                             | -214.3 | -228.4 | -274.2 | -277.3 | -278.4 |
| 248.0              |                    | Difference absolut / %                                           | 215.4                                                              | 214.3  | 228.4  | 274.2  | 277.3  | 278.4  |
| Stagnant           | 6mm/5mm dissimilar | ECVT                                                             | 13.6                                                               | 26.5   | 47.6   | 66.3   | 77.3   | 94.1   |
|                    |                    | Visual reference                                                 | 16.0                                                               | 28.9   | 45.3   | 69.4   | 80.9   | 92.3   |
| Mean deviation / % |                    | Difference / %                                                   | 15.2                                                               | 8.5    | -5.1   | 4.3    | 4.5    | -2.0   |
| 6.6                |                    | Difference absolut / %                                           | 15.2                                                               | 8.5    | 5.1    | 4.3    | 4.5    | 2.0    |
| Circulation        | w/o                | ECVT                                                             | 1.4                                                                | 3.9    | 6.9    | 10.4   | 13.0   | 17.6   |
|                    |                    | Visual reference                                                 | 2.3                                                                | 7.0    | 13.8   | 18.4   | 21.7   | 27.3   |
| Mean deviation / % |                    | Difference / %                                                   | 38.8                                                               | 44.5   | 49.9   | 43.5   | 40.1   | 35.6   |
| 42.1               |                    | Difference absolut / %                                           | 38.8                                                               | 44.5   | 49.9   | 43.5   | 40.1   | 35.6   |
| Circulation        | 6mm on the tip     | ECVT                                                             | 16.4                                                               | 29.2   | 40.0   | 46.9   | 56.2   | 64.4   |
|                    |                    | Visual reference                                                 | 5.8                                                                | 12.8   | 19.6   | 26.3   | 30.8   | 38.5   |
| Mean deviation / % |                    | Difference / %                                                   | -181.0                                                             | -128.4 | -103.8 | -78.1  | -82.4  | -67.5  |
| 106.9              |                    | Difference absolut / %                                           | 181.0                                                              | 128.4  | 103.8  | 78.1   | 82.4   | 67.5   |
| Circulation        | 5mm on the tip     | ECVT                                                             | 28.6                                                               | 34.4   | 45.2   | 52.0   | 75.2   | 102.7  |
|                    |                    | Visual reference                                                 | 5.8                                                                | 12.8   | 18.5   | 21.9   | 31.9   | 35.2   |
| Mean deviation / % |                    | Difference / %                                                   | -388.5                                                             | -169.0 | -144.6 | -138.0 | -135.8 | -191.9 |
| 194.6              |                    | Difference absolut / %                                           | 388.5                                                              | 169.0  | 144.6  | 138.0  | 135.8  | 191.9  |
| Circulation        | 6mm/5mm dissimilar | ECVT                                                             | 5.6                                                                | 8.1    | 9.6    | 19.4   | 24.1   | 26.4   |
|                    |                    | Visual reference                                                 | 4.7                                                                | 11.6   | 19.5   | 25.1   | 31.7   | 37.2   |
| Mean deviation / % |                    | Difference / %                                                   | -19.4                                                              | 30.1   | 50.9   | 22.5   | 24.0   | 28.9   |
| 29.3               |                    | Difference absolut / %                                           | 19.4                                                               | 30.1   | 50.9   | 22.5   | 24.0   | 28.9   |

**Figure S1.** ECVT using gear (type: Gather Industrie® D2X30) vs. centrifugal pump (type: Rover Pompe BE – M 20 IP 55).

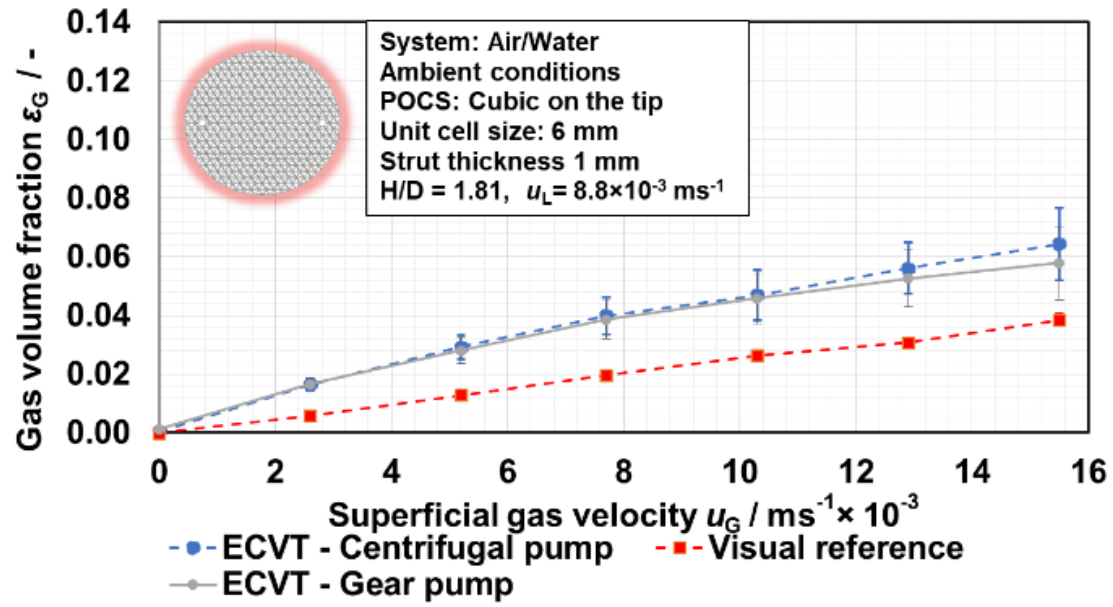

Supplement: s1 [file s1]
